# Supplementary material
Source: PubMed Central journal article supplement (PMC2519954)
Supplement: NIHMS62273-supplement-si20070226_044.pdf [file NIHMS62273-supplement-si20070226_044.pdf]

## SUPPORTING INFORMATION

### **Targeted drug delivery utilizing protein-like molecular architecture**

Evonne M. Rezler, David R. Khan, Janelle Lauer-Fields,  
Diane Baronas-Lowell, and Gregg B. Fields

Department of Chemistry & Biochemistry and  
Center for Molecular Biology & Biotechnology, Florida Atlantic University,  
777 Glades Road, Boca Raton, FL 33431 U.S.A.  
Phone 561-297-2093, Fax 561-297-2759, e-mail [fieldsg@fau.edu](mailto:fieldsg@fau.edu)

**Supporting Information Table.** Liposome sizes after 30 days.

| Liposome Formulation                 | Liposome Diameter (nm) |          |          |
|--------------------------------------|------------------------|----------|----------|
|                                      | 4 °C                   | 25 °C    | 37 °C    |
| DSPG:DSPC:Cholesterol (1:4:5)        | 125 ± 17               | 115 ± 5  | 124 ± 9  |
| DSPG:DPPC:Cholesterol (1:4:5)        | 118 ± 8                | 126 ± 13 | 119 ± 7  |
| DSPG:DSPC:Cholesterol:PA (1:4:5:0.1) | 128 ± 5                | 125 ± 11 | 117 ± 9  |
| DSPG:DPPC:Cholesterol:PA (1:4:5:0.1) | 117 ± 15               | 120 ± 7  | 130 ± 10 |

## SUPPORTING INFORMATION FIGURE LEGENDS

**Figure S1.** Microscope images of cellular fluorophore accumulation based on non-targeted liposome delivery. Delivery of rhodamine was monitored as a function of time for (left panel) human metastatic melanoma cells (M14#5), (middle panel) normal fibroblasts from a metastatic melanoma patient (Hs895Sk), and (right panel) normal foreskin fibroblasts (BJ).

**Figure S2.** Microscope images of inhibition of rhodamine incorporation into normal foreskin fibroblasts (BJ). Cells were initially treated with 0 (far left panel), 25 (second from left panel), 50 (second from right panel), or 100 (far right panel)  $\mu\text{M}$  exogenous  $\alpha 1(\text{IV})1263\text{-}1277$  THP for 30 min, followed by treatment with  $\alpha 1(\text{IV})1263\text{-}1277$  PA liposomes.

**Figure S3.** Microscope images of inhibition of rhodamine incorporation into fibroblasts from a metastatic melanoma patient (Hs895Sk). Cells were initially treated with 0 (far left panel), 25 (second from left panel), 50 (second from right panel), or 100 (far right panel)  $\mu\text{M}$  exogenous  $\alpha 1(\text{IV})1263\text{-}1277$  THP for 30 min, followed by treatment with  $\alpha 1(\text{IV})1263\text{-}1277$  PA liposomes.

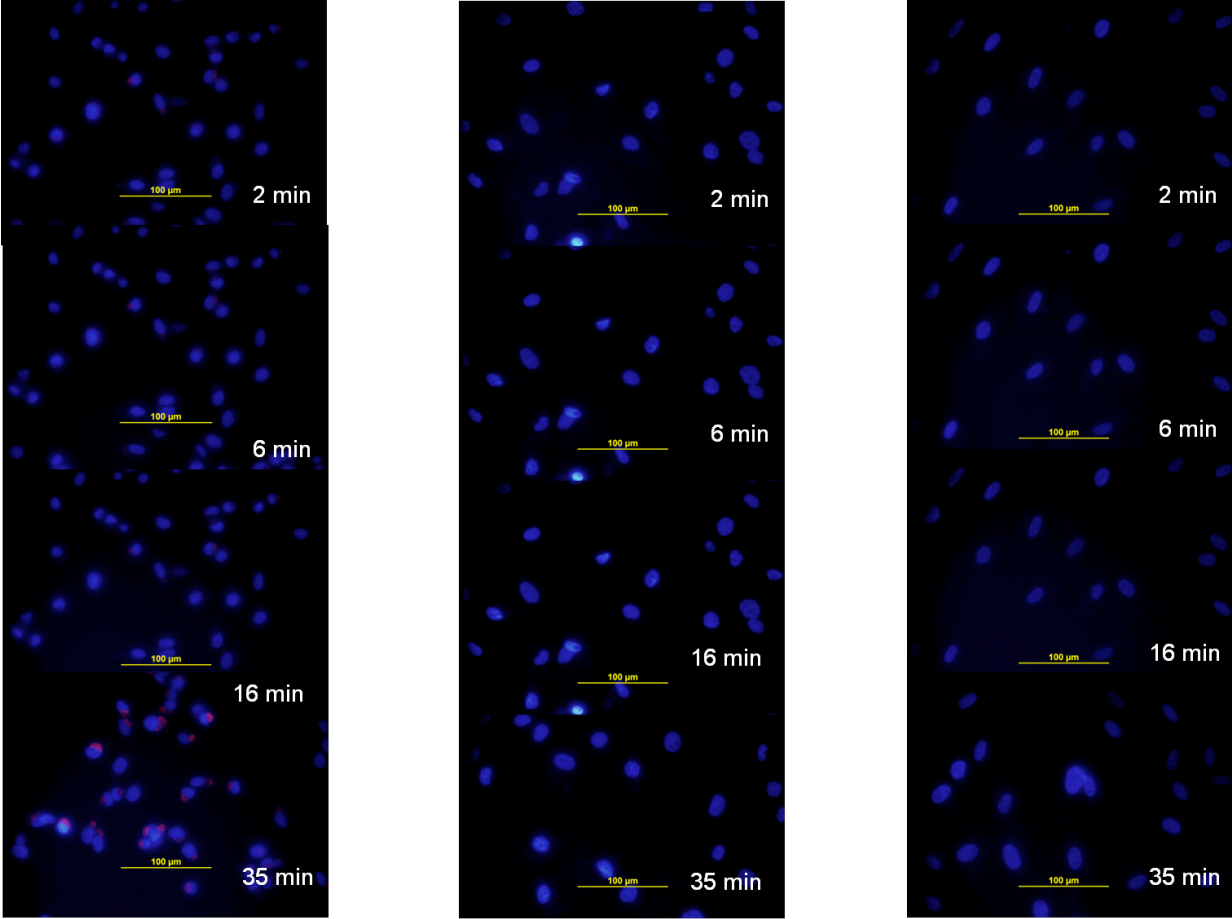

Figure S1

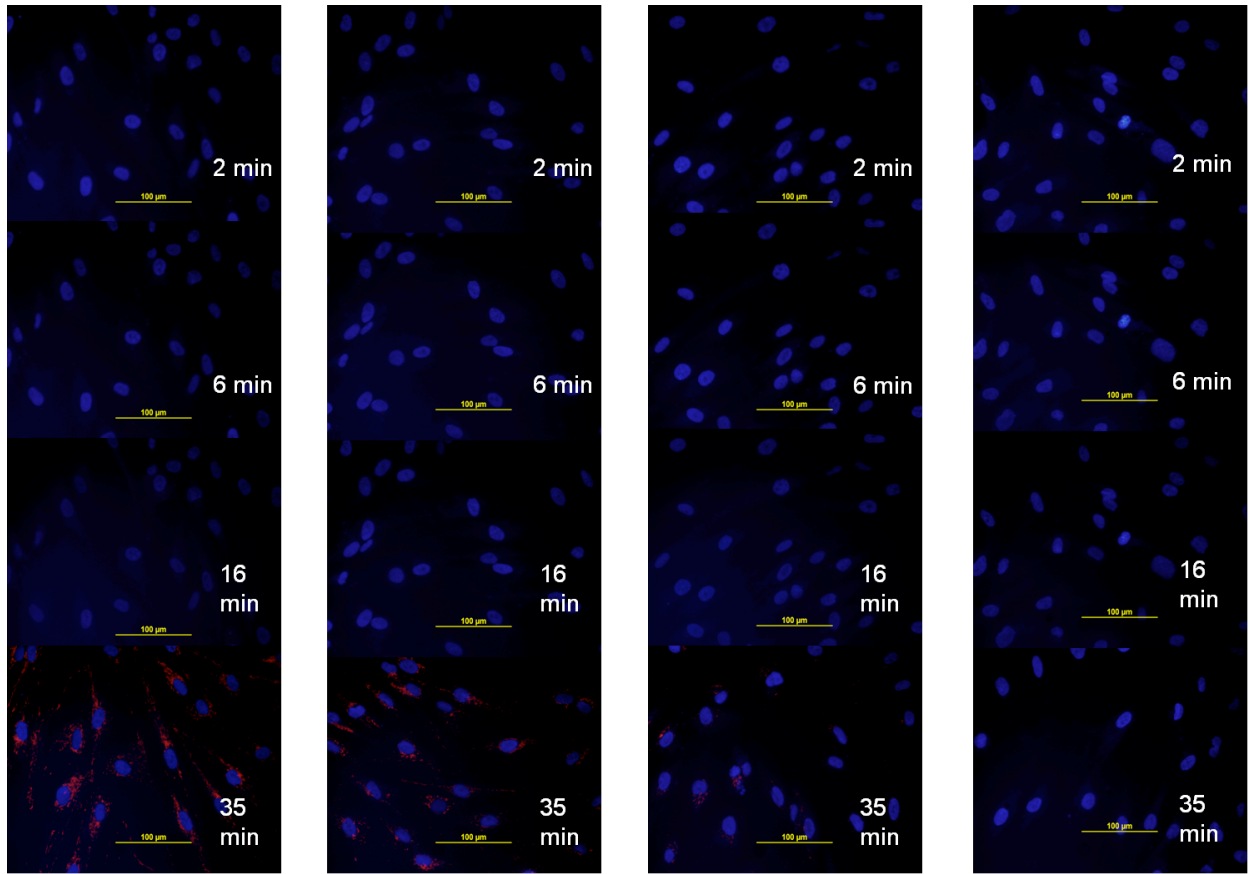

Figure S2

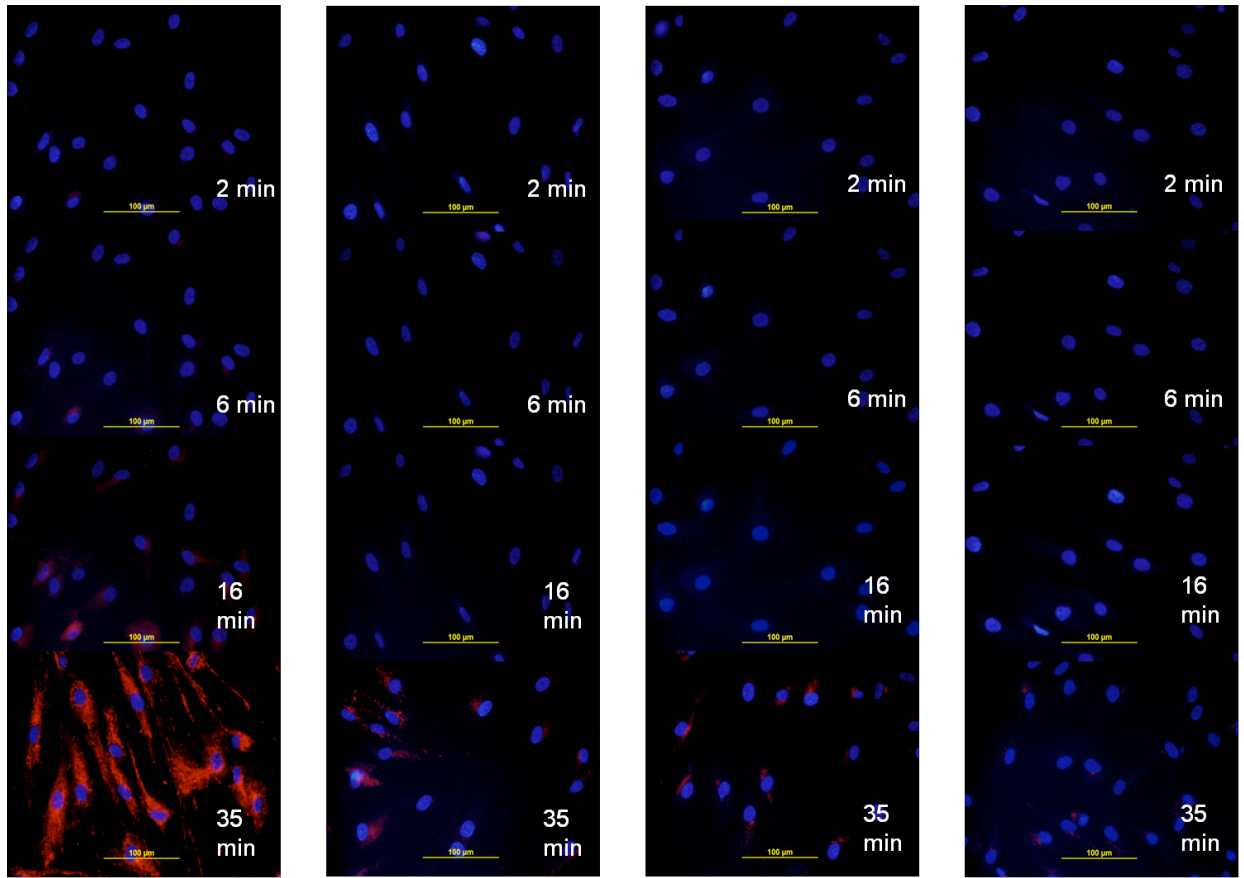

Figure S3
